# Supplementary material for: Decrease of total electron content during the 9 March 2016 total solar eclipse observed at low latitude stations, Indonesia
Source: Copernicus journal article supplement (doi:10.5194/angeo-2019-11), 2019-01-24
Supplement: Supplementary file [file angeo-2019-11-RC1-supplement.pdf]

## Comments on

Manuscript Number: angeo-2019-11

“Decrease of total electron content during the 9 March 2016 total solar eclipse observed at low latitude stations, Indonesia”

by

Wahyu Srigutomo, Alamta Singarimbun, Winda Meutia, I Gede Putu Fadjar Soerya Djaja,  
Buldan Muslim and Prayitno Abadi

The solar eclipse is a short-term phenomenon in which many features of change of ionospheric parameters are pressed in a small time interval. In the given paper, the detailed study of behavior of the total electron content TEC is executed over Indonesia during a solar eclipse on March, 9<sup>th</sup>, 2016. It is shown, that in this area behavior of TEC possesses certain features.

The paper corresponds to topics of this journal and can be recommended to the publication after the account of the following comments.

### The main comments

1. Page 2, a line 22: it is desirable to specify, what system of co-ordinates (geographical or geomagnetic) Figure 1 is presented in. The same concerns to Figure 2.
2. Page 4, lines 14-19: a little inconsistent paragraph. On the one hand, in lines 14-17 it is underlined, that during the main period of the eclipse an increase of TEC is observed, on the other hand, in lines 17-19 a decrease of TEC is marked. It is desirable to clarify. Also, it is necessary to explain, what means a word-combination «concentrations of TEC»: value, size, color?
3. Page 5, a line 15: Table 1 has appeared earlier than the reference to it. It is desirable to specify number of station from Figure 1.

### Some small remarks

1. Page 1, a line 13: to replace «ionospheric».
2. Page 1, a line 16, page 11, a line 7: faster to replace on less.
3. Page 3, a line 20: are to replace on is.
4. Page 8, a line 5: confuses a word «farther».
5. Page 10, a line 9: can be in a word-combination «that that the» there is anything superfluous?
6. Page 11, a line 22: respon to replace on response.
7. Page 11, a line 28: respons to replace on response.
8. Page 11, a line 29: atmos to replace on Atmos.
9. Page 12, a line 10: to move the reference to page 12, a line 31.
10. Page 12, a line 22: new to replace on New.
11. Page 12, a line 29: march to replace on March.
